# Supplementary material for: Nuclear proteasomes buffer cytoplasmic proteins during autophagy compromise
Source: PubMed Central journal article supplement (PMC11469956; doi:10.1038/s41556-024-01488-7), 2024-08-29
Supplement: 41556_2024_1488_MOESM1_ESM.pdf [file 41556_2024_1488_MOESM1_ESM.pdf]

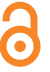

---

# Nuclear proteasomes buffer cytoplasmic proteins during autophagy compromise

---

In the format provided by the authors and unedited

---

# Supplementary information.

## Sequential gating strategy for analysis of gRNA plasmid infected cells.

### a. HeLa (no Cas9)

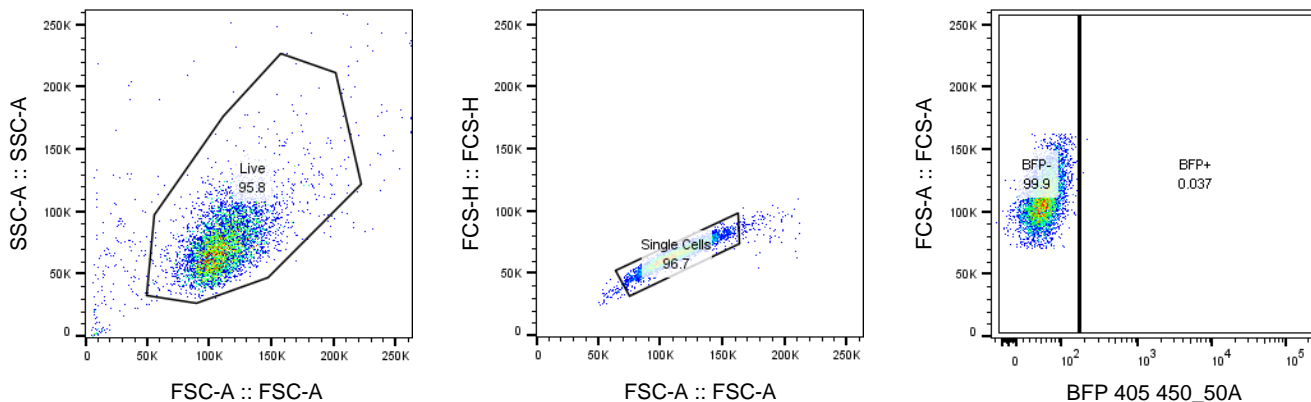

### b. HeLa/Cas9 cell line with gRNA plasmid infection

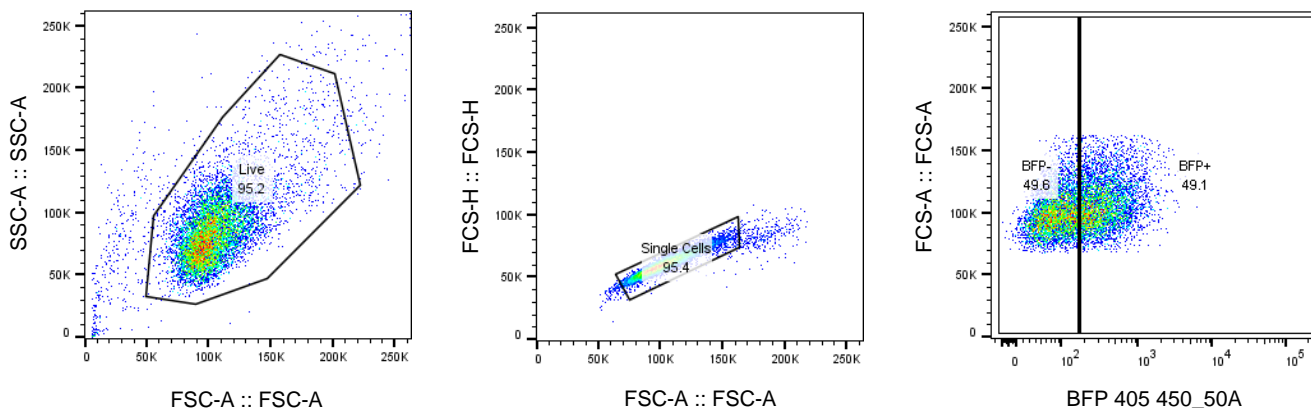

Cells were first gated on forward (FSC-A) and side scatter (SSC-A) and then for singlets (FSC-A/FSC-H), before gating the BFP+ cells. Gates for BFP positive cells population (BFP+) were defined using wild-type HeLa cells (no Cas9 cell line).
