# Supplementary material for: Nuclear proteasomes buffer cytoplasmic proteins during autophagy compromise
Source: PubMed Central journal article supplement (PMC11469956; doi:10.1038/s41556-024-01488-7), 2024-08-29

**Unprocessed blots Fig. 4.** Square indicates the section shown in the main figures. Molecular weight is shown on the left.

**Fig 4a**

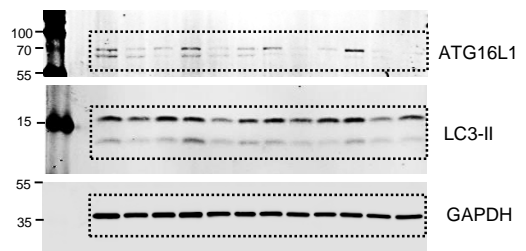

**Fig 4d**

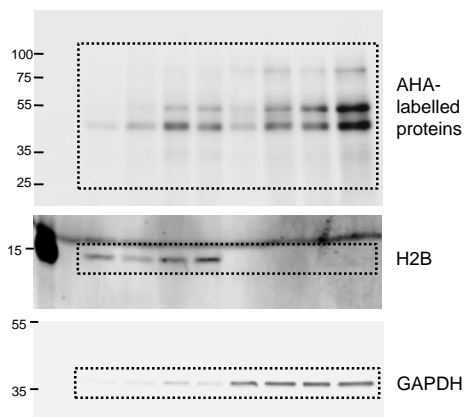

Supplement: 41556_2024_1488_MOESM11_ESM.pdf [file 41556_2024_1488_MOESM11_ESM.pdf]
