# Supplementary material for: Nuclear proteasomes buffer cytoplasmic proteins during autophagy compromise
Source: PubMed Central journal article supplement (PMC11469956; doi:10.1038/s41556-024-01488-7), 2024-08-29

**Unprocessed blots Extended Data Fig. 6.** Square indicates the section shown in the Extended Data Figures. Molecular weight is shown on the left.

**Extended Data Fig 6d**

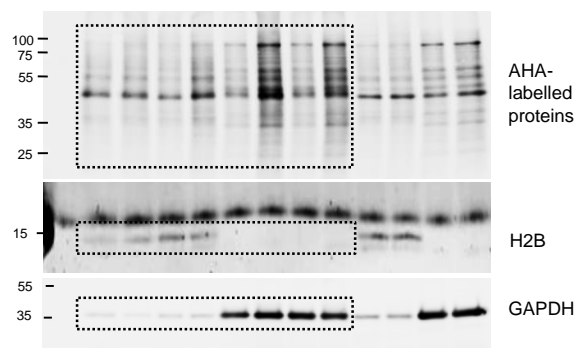

**Extended Data Fig 6g**

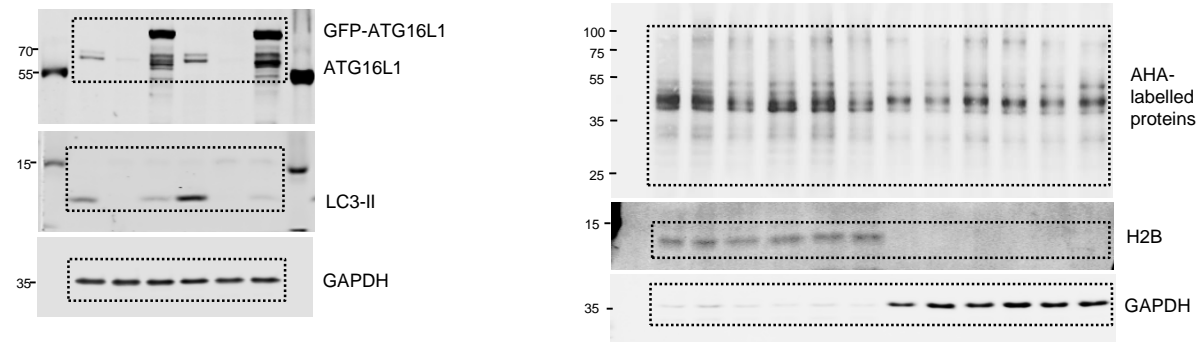

Supplement: 41556_2024_1488_MOESM21_ESM.pdf [file 41556_2024_1488_MOESM21_ESM.pdf]
