# Supplementary material for: Nuclear proteasomes buffer cytoplasmic proteins during autophagy compromise
Source: Nat Cell Biol. 2024 Aug 29;26(10):1691–9. doi: 10.1038/s41556-024-01488-7 (PMC11469956; doi:10.1038/s41556-024-01488-7)

**Unprocessed blots Fig. 1.** Square indicates the section shown in the main figures. Molecular weight is shown on the left.

**Fig 1d**

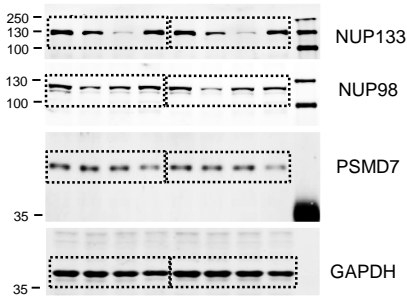

Supplement: Supplementary file 5 — Unprocessed western blots and/or gels. [file 41556_2024_1488_MOESM5_ESM.pdf]
